# Supplementary material for: Transcriptome analysis and identification of genes related to terpenoid biosynthesis in Cinnamomum camphora
Source: PubMed Central journal article supplement (PMC6057064; doi:10.1186/s12864-018-4941-1), 2018-07-24

A

DOWN-DEG-F\_LvsL\_L

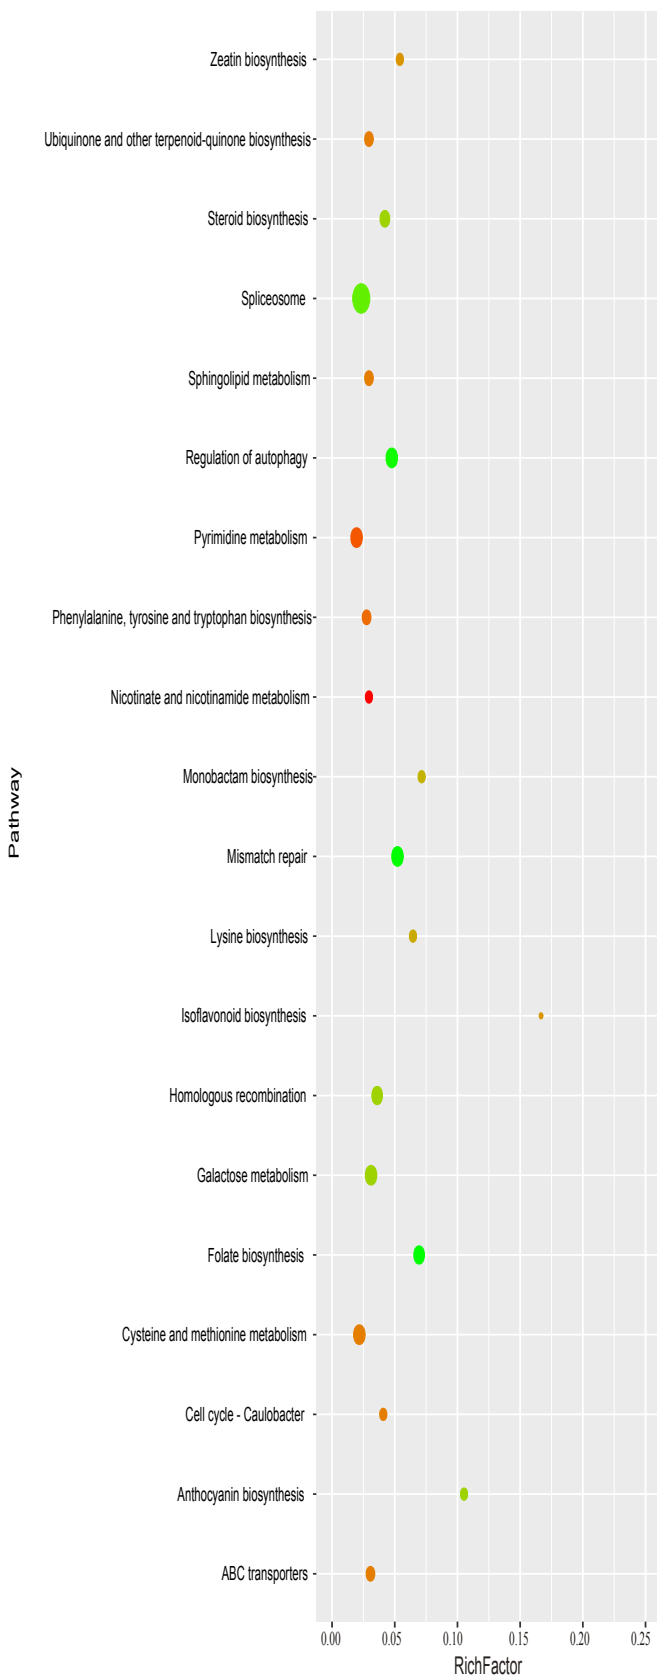

B

UP-DEG-F\_LvsL\_L

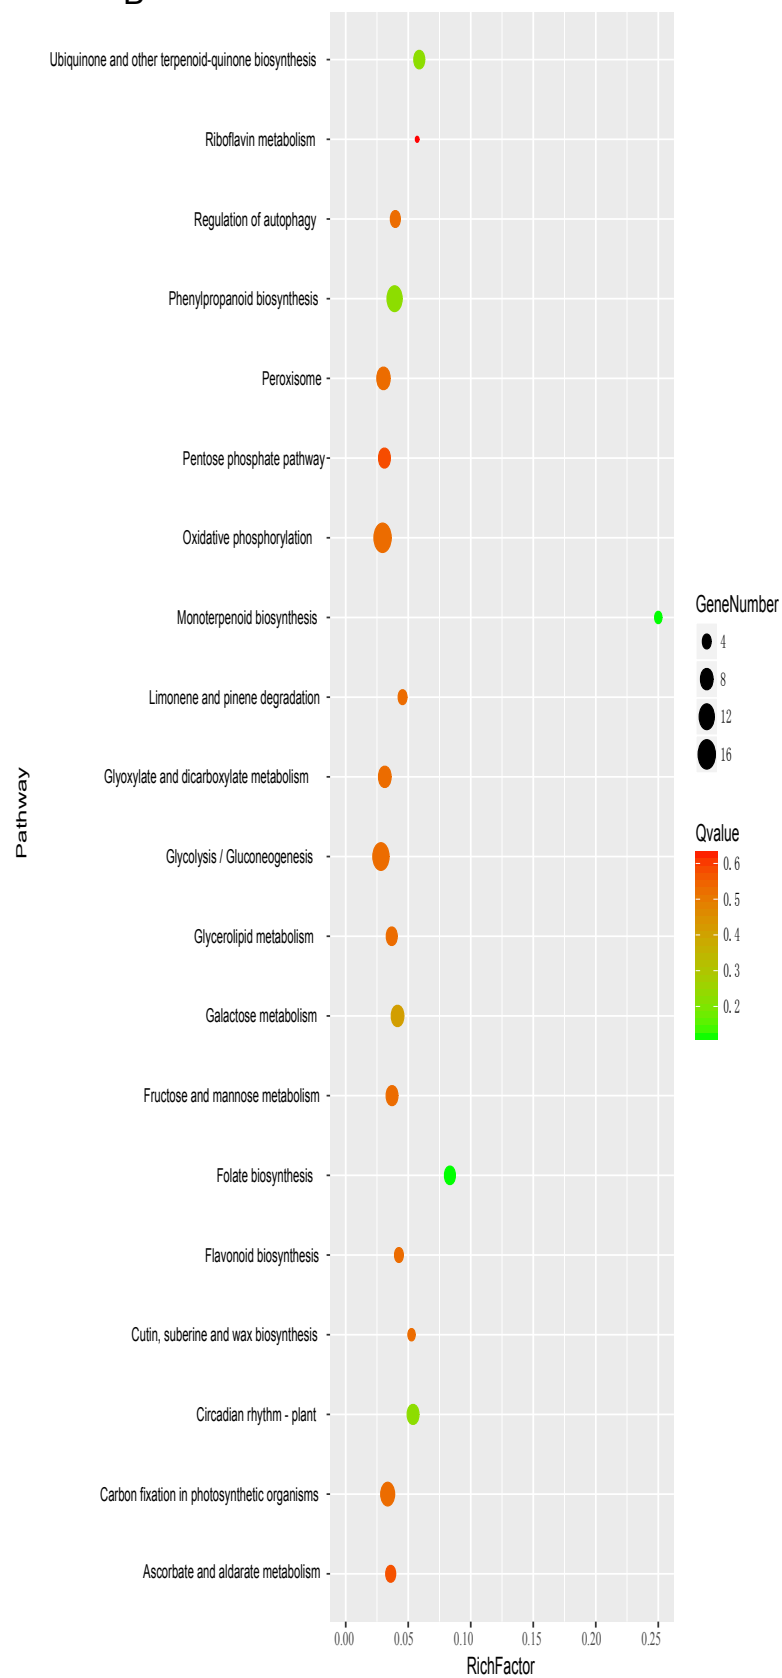

Supplement: 12864_2018_4941_MOESM4_ESM.pdf [file 12864_2018_4941_MOESM4_ESM.pdf]
