# Supplementary material for: Transcriptome analysis and identification of genes related to terpenoid biosynthesis in Cinnamomum camphora
Source: PubMed Central journal article supplement (PMC6057064; doi:10.1186/s12864-018-4941-1), 2018-07-24

A

CLUSTAL 2.1 MULTIPLE SEQUENCE ALIGNMENT

File: D:/LIS and BPPS\_protien.ps  
Page 1 of 2

Date: Tue May 29 11:36:26 2018

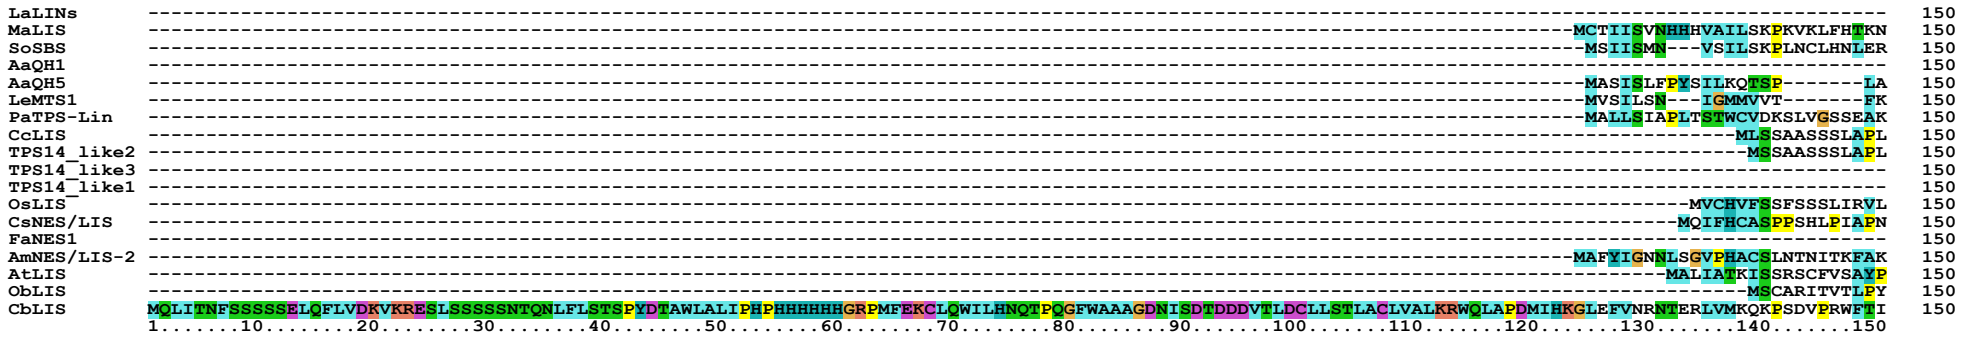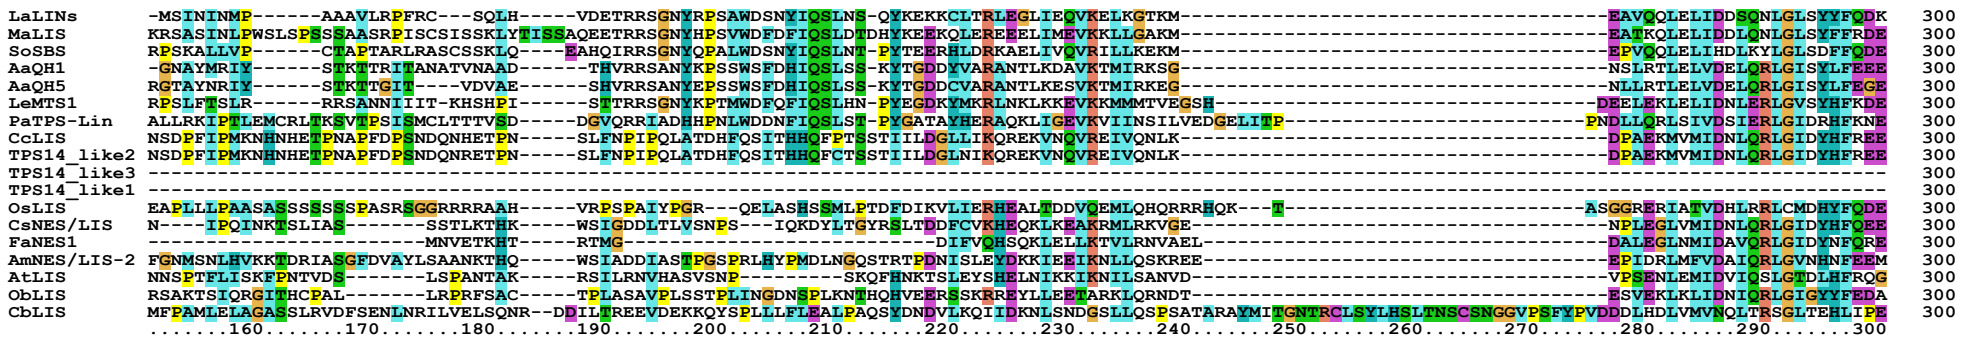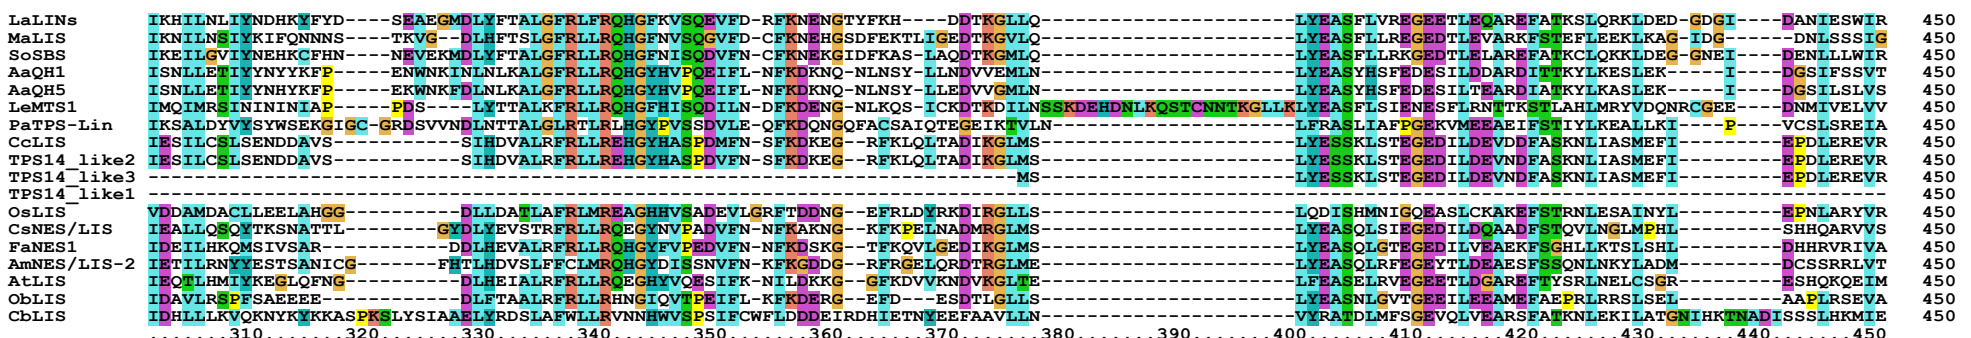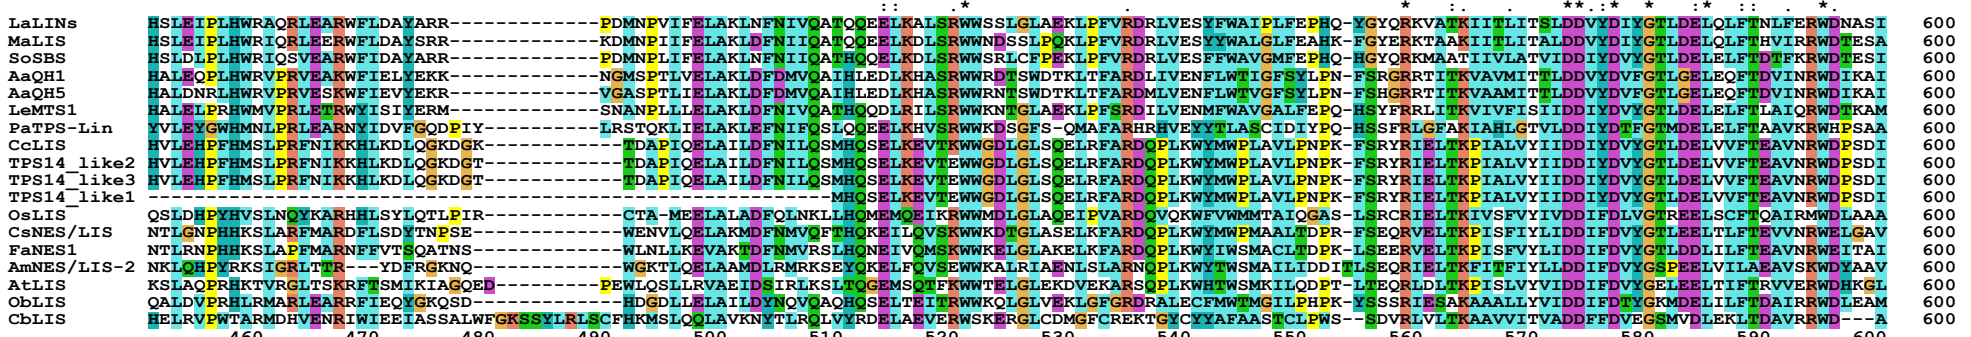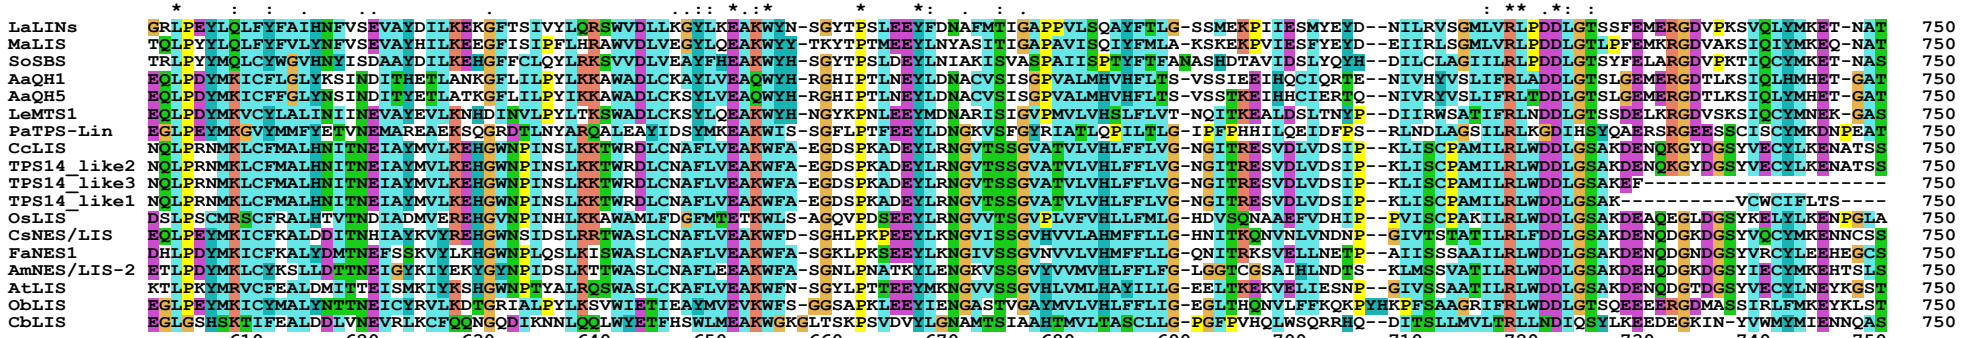

B

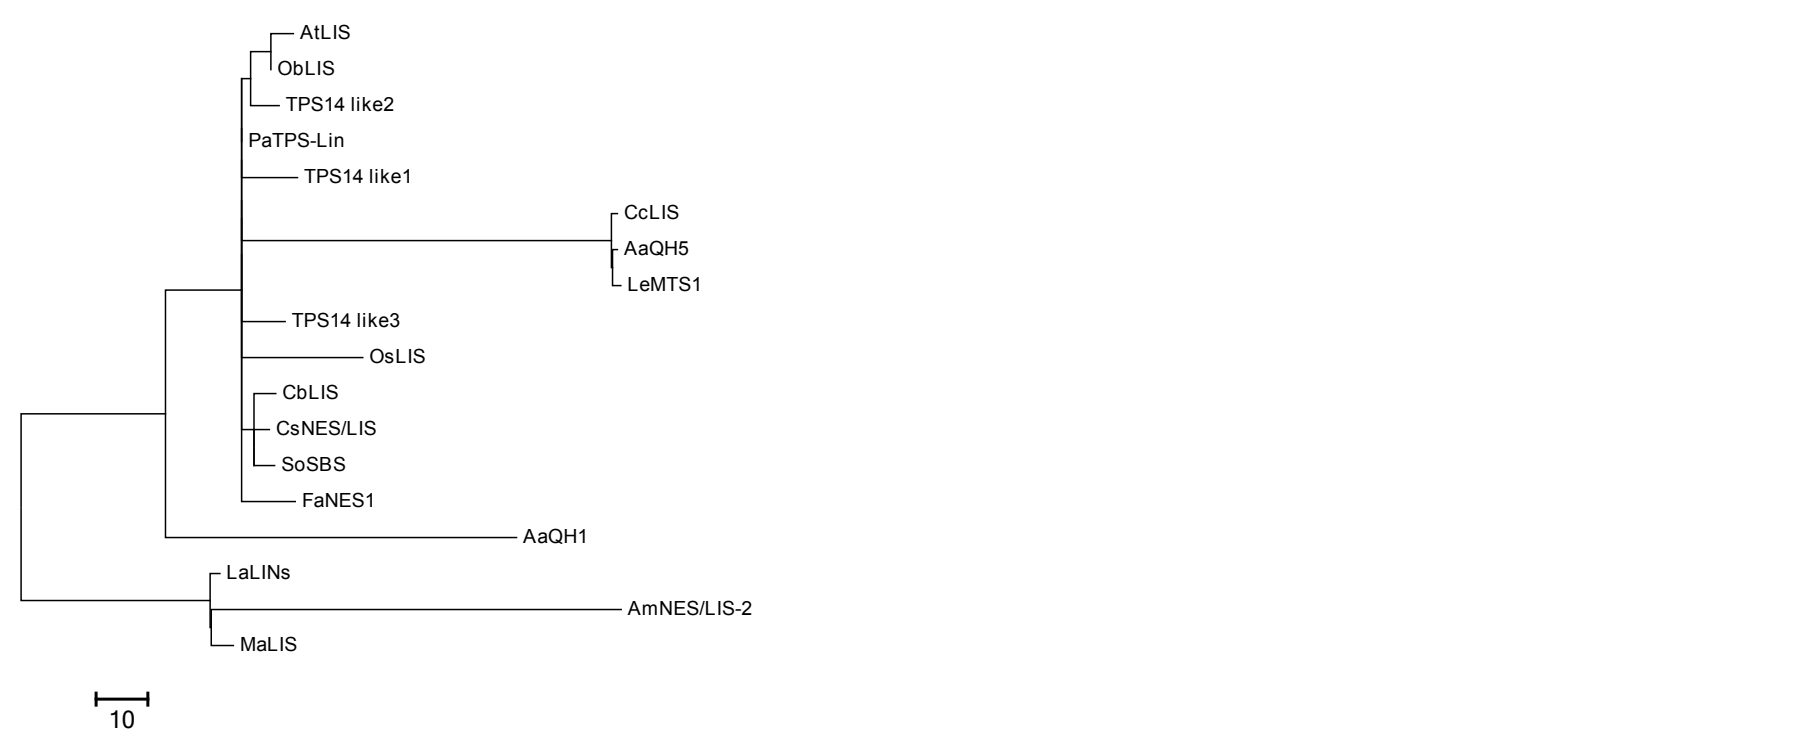

Supplement: 12864_2018_4941_MOESM6_ESM.pdf [file 12864_2018_4941_MOESM6_ESM.pdf]
